# Supplementary material
Source: publisher figshare collection journal article supplement (https://acs.figshare.com/ndownloader/files/6946271)
Supplement: Supplementary file 1 [file 6946271]

**Supporting Information for**

**Quantitative Analysis of Transition-Metal Migration Induced**

**Electrochemically in Lithium-Rich Layered Oxide Cathode and**

**Its Contribution to Properties at High and Low Temperatures**

Ikuma Takahashi,<sup>†,‡</sup> Katsutoshi Fukuda,<sup>§</sup> Tomoya Kawaguchi,<sup>§</sup> Hideyuki Komatsu,<sup>§</sup>  
Masatsugu Oishi,<sup>§</sup> Haruno Murayama,<sup>§</sup> Masaharu Hatano,<sup>‡</sup> Takayuki Terai,<sup>†</sup> Hajime Arai,<sup>§</sup>  
Yoshiharu Uchimoto,<sup>//</sup> and Eiichiro Matsubara<sup>§,⊥</sup>

<sup>†</sup> Department of Nuclear Engineering and Management, School of Engineering, The University of  
Tokyo, 7-3-1 Hongo, Bunkyo-ku, Tokyo 113-8656, Japan

<sup>‡</sup> Nissan Research Center, Nissan Motor Company, Limited, 1 Natsushima-cho, Yokosuka-shi,  
Kanagawa 237-8523, Japan

<sup>§</sup> Office of Society-Academia Collaboration for Innovation, Kyoto University, Gokasho, Uji, Kyoto  
611-0011, Japan

<sup>//</sup> Graduate School of Human and Environmental Studies and <sup>⊥</sup> Department of Materials Science &  
Engineering, Kyoto University, Yoshida-Honmachi, Sakyo-ku, Kyoto 606-8501, Japan

Table S1. Ni *K*-edge absorption edge energies,  $E_0$ , (are defined the energy value at half absorbance of the peak) top at HT and LT with  $x$  in  $\text{Li}_{1.2-x}\text{Ni}_{0.13}\text{Co}_{0.13}\text{Mn}_{0.53}\text{O}_2$  in charging.

| Charge            | $x$ | 0      | 0.45   | 0.80   | 1.04   |
|-------------------|-----|--------|--------|--------|--------|
| $E_0 / \text{eV}$ | LT  | 8341.3 | 8343.3 | 8344.1 | -      |
|                   | HT  | 8341.3 | 8342.1 | -      | 8344.2 |

Table S2. Ni *K*-edge absorption edge energies,  $E_0$ , (are defined the energy value at half absorbance of the peak) top at HT and LT with  $x$  in  $\text{Li}_{1.2-x}\text{Ni}_{0.13}\text{Co}_{0.13}\text{Mn}_{0.53}\text{O}_2$  in discharging.

| Discharge         | $x$ | 0      | 0.33   | 0.51   | 0.99   |
|-------------------|-----|--------|--------|--------|--------|
| $E_0 / \text{eV}$ | LT  | -      | 8340.9 | 8340.7 | 8343.3 |
|                   | HT  | 8340.9 | -      | 8341.3 | 8343.3 |

Table S3. Atomic ratio change of Mn, and Ni of  $x$  in  $\text{Li}_{1.2-x}\text{Ni}_{0.13}\text{Co}_{0.13}\text{Mn}_{0.53}\text{O}_2$  in Li site during the charge process at 40 °C (HT) and –10 °C (LT).

| Charge | $x$ | 0   | 0.45 | 0.80 | 1.04 |
|--------|-----|-----|------|------|------|
| Mn / % | LT  | 3.1 | 8.3  | 11   | -    |
|        | HT  | 3.1 | 9.3  | -    | 12   |
| Ni / % | LT  | 13  | 15   | 15   | -    |
|        | HT  | 13  | 14   | -    | 15   |

Table S4. Atomic ratio change of Mn, and Ni of  $x$  in  $\text{Li}_{1.2-x}\text{Ni}_{0.13}\text{Co}_{0.13}\text{Mn}_{0.53}\text{O}_2$  in Li site during the discharge process at 40 °C (HT) and –10 °C (LT).

| Discharge | $x$ | 0   | 0.33 | 0.51 | 0.99 |
|-----------|-----|-----|------|------|------|
| Mn / %    | LT  | -   | 8.2  | 11   | 15   |
|           | HT  | 4.0 | -    | 11   | 15   |
| Ni / %    | LT  | -   | 15   | 18   | 19   |
|           | HT  | 8.7 | -    | 18   | 19   |

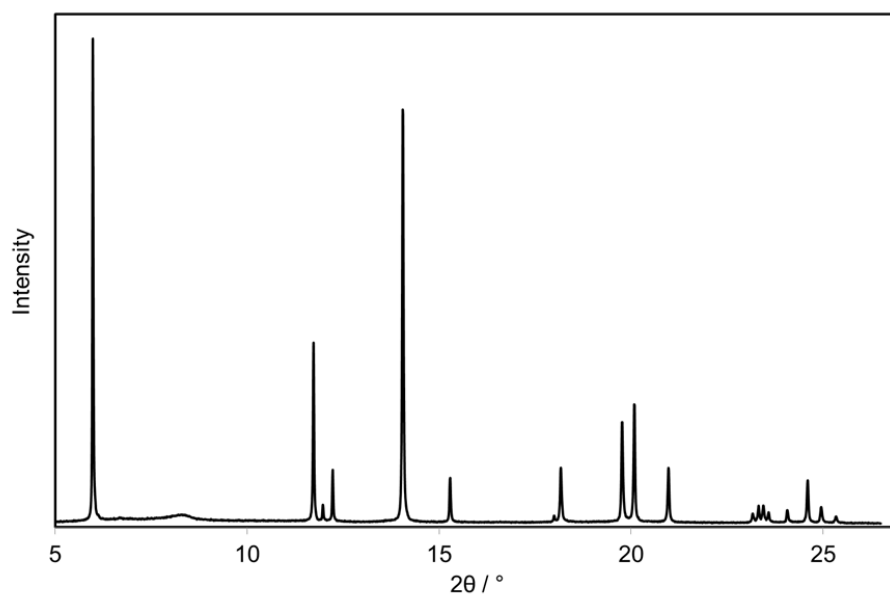

Figure S1. XRD pattern of  $x$  in  $\text{Li}_{1.2-x}\text{Ni}_{0.13}\text{Co}_{0.13}\text{Mn}_{0.53}\text{O}_2$  ( $x=0$ ) after activation.

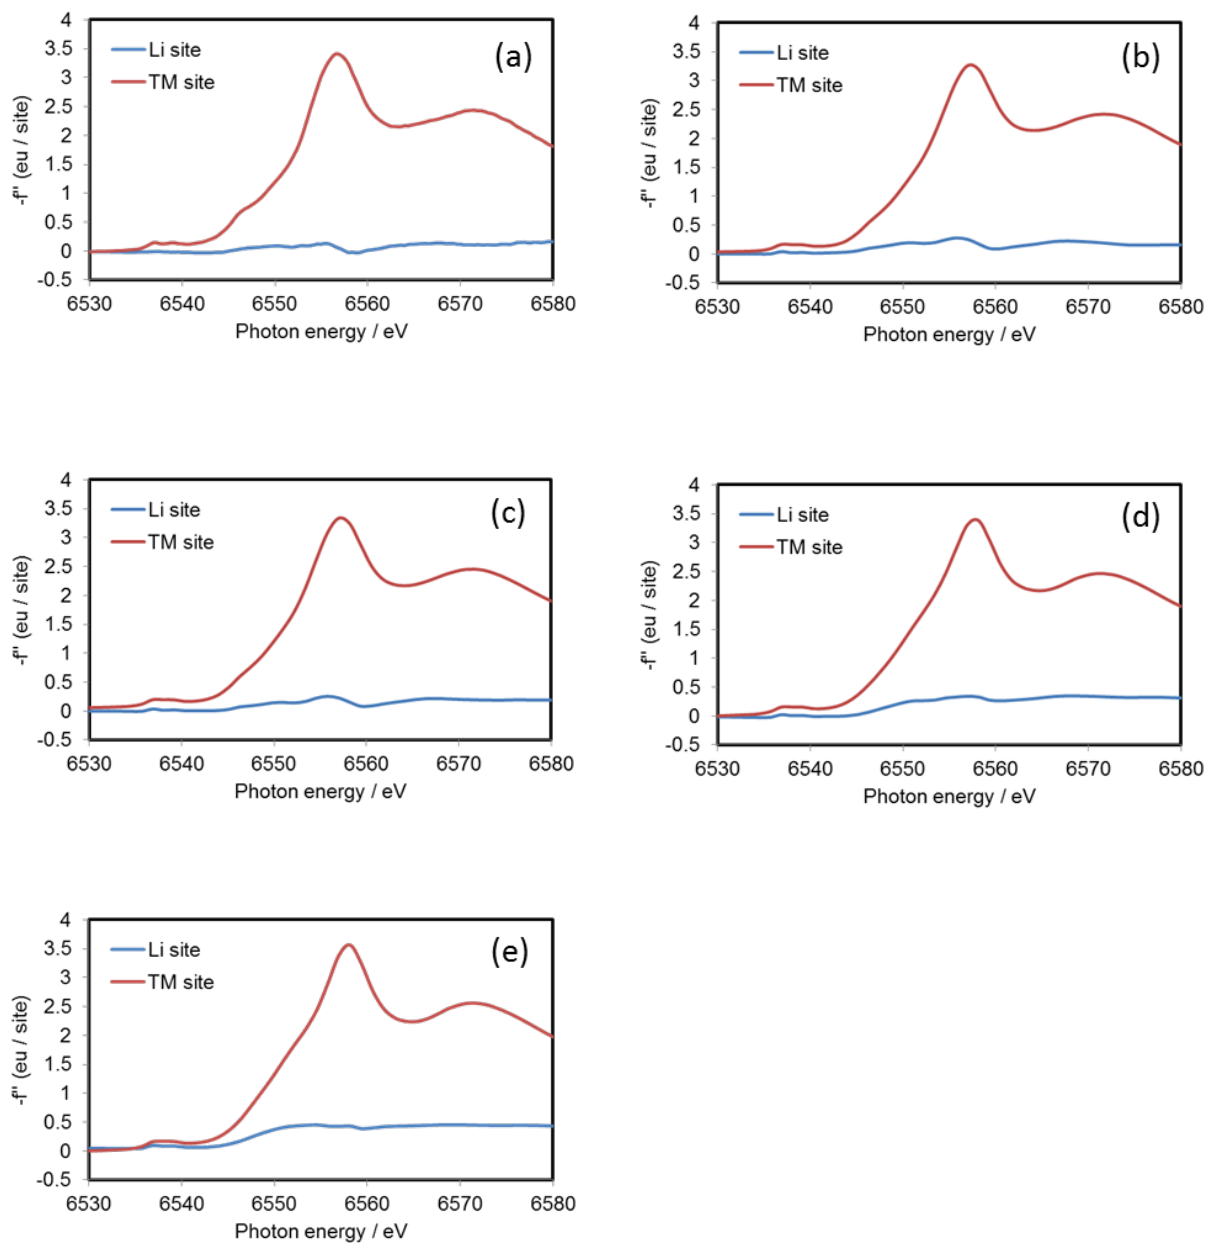

Figure S2. XAFS-like spectra of Mn at TM site and Li site in charging process with  $x$  in  $\text{Li}_{1.2-x}\text{Ni}_{0.13}\text{Co}_{0.13}\text{Mn}_{0.53}\text{O}_2$  (a)  $x=0$  (b)  $x=0.45$  (LT) (c)  $x=0.45$  (HT) (d)  $x=0.80$  (LT) (e)  $x=1.04$  (HT).

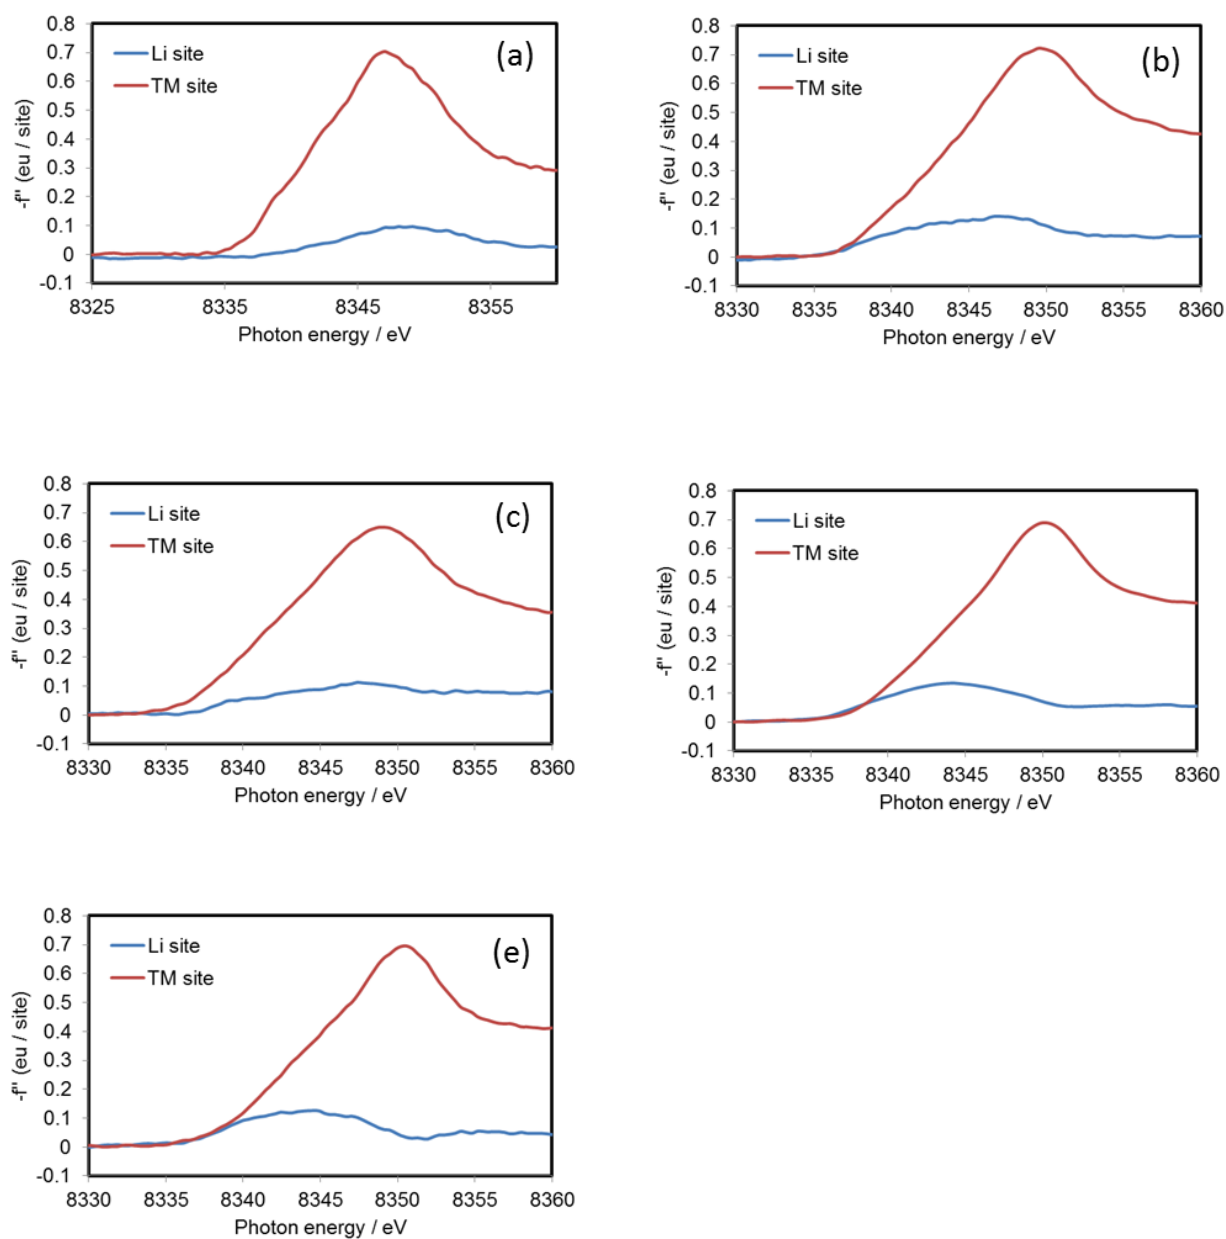

Figure S3. XAFS-like spectra of Ni at TM site and Li site in charging process with  $x$  in  $\text{Li}_{1.2-x}\text{Ni}_{0.13}\text{Co}_{0.13}\text{Mn}_{0.53}\text{O}_2$  (a)  $x = 0$  (b)  $x = 0.45$  (LT) (c)  $x = 0.45$  (HT) (d)  $x = 0.80$  (LT) (e)  $x = 1.04$  (HT).

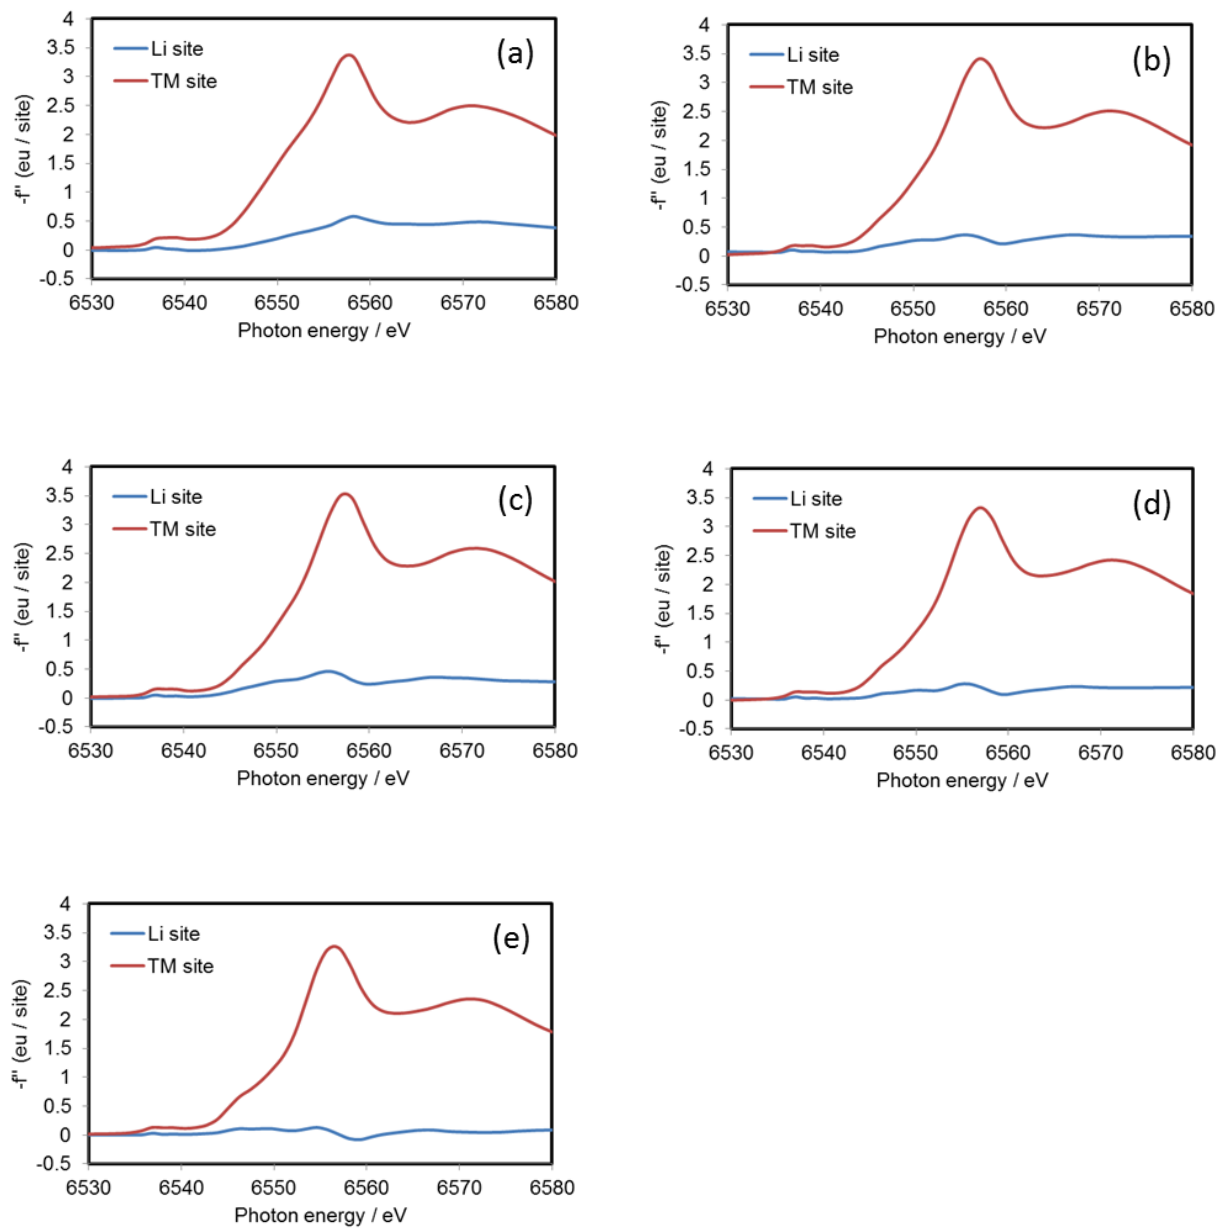

Figure S4. XAFS-like spectra of Mn at TM site and Li site in discharging process with  $x$  in  $\text{Li}_{1.2-x}\text{Ni}_{0.13}\text{Co}_{0.13}\text{Mn}_{0.53}\text{O}_2$  (a)  $x = 1.0$  (b)  $x = 0.51$  (LT) (c)  $x = 0.51$  (HT) (d)  $x = 0.33$  (LT) (e)  $x = 1.0$  (HT).

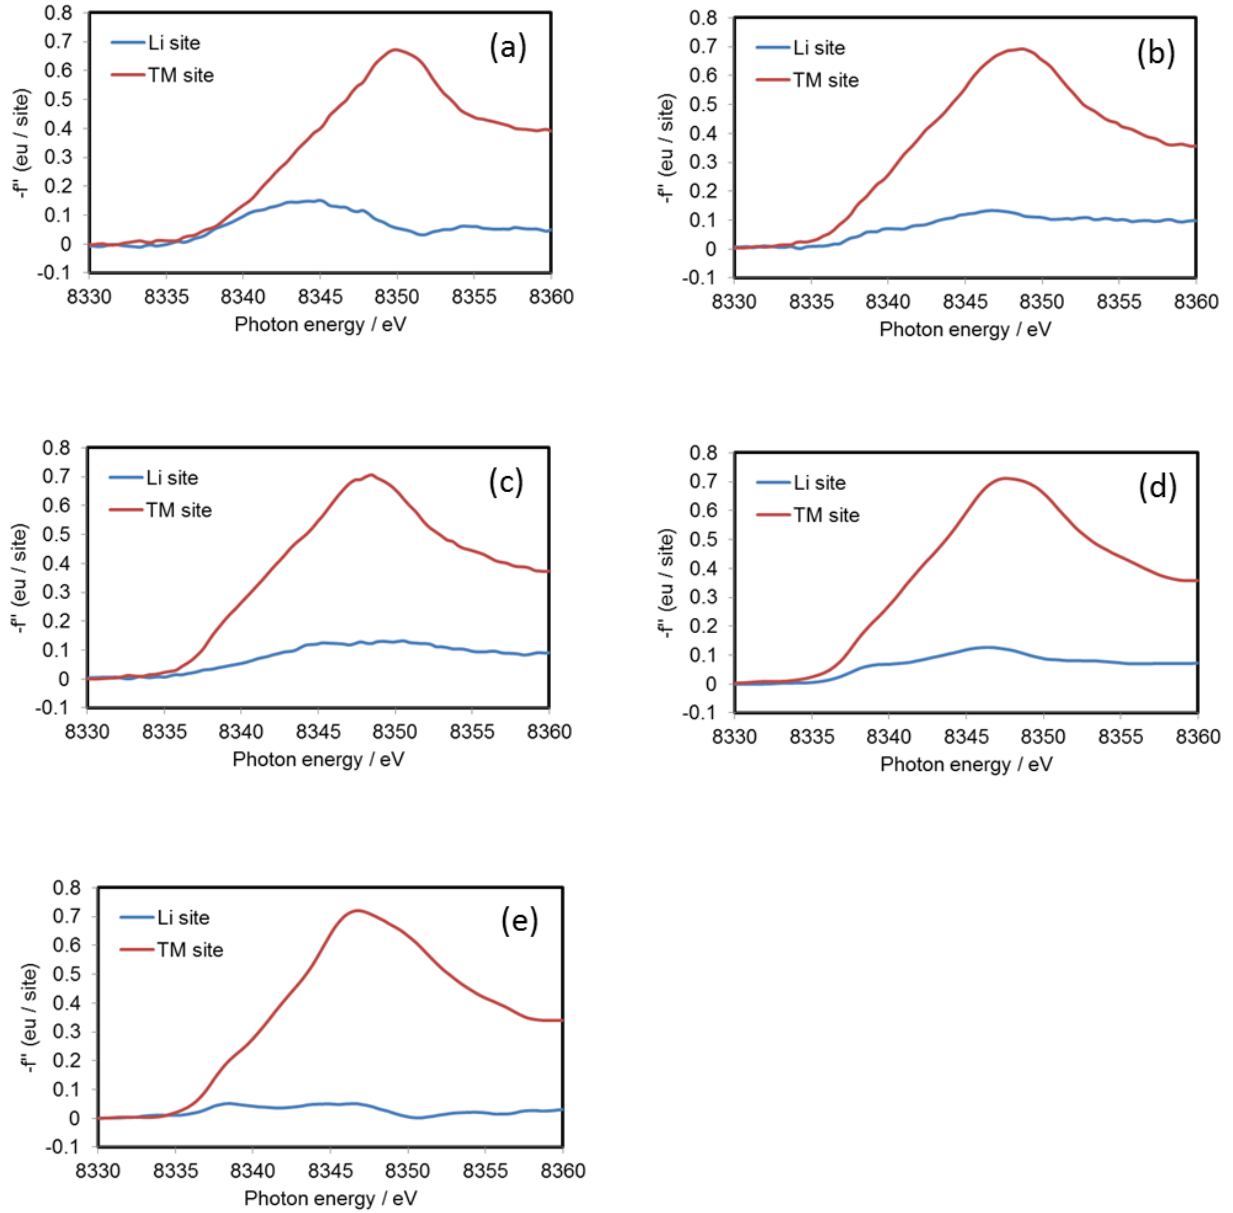

Figure S5. XAFS-like spectra of Ni at TM site and Li site in discharging process with  $x$  in  $\text{Li}_{1.2-x}\text{Ni}_{0.13}\text{Co}_{0.13}\text{Mn}_{0.53}\text{O}_2$  (a)  $x=1.0$  (b)  $x = 0.51$  (LT) (c)  $x = 0.51$  (HT) (d)  $x = 0.33$  (LT) (e)  $x = 1.0$  (HT).
